# Supplementary material for: Hydrothermal synthesis and structure of organically templated layered neptunyl(vi) phosphate (NpO2)3(PO4)2(Terpy)
Source: Royal Society of Chemistry journal article supplement (doi:10.1039/d4ce00121d), 2024-01-01
Supplement: d4ce00121d1.pdf [file d4ce00121d1.pdf]

## Supplementary Information

# Hydrothermal synthesis and structure of organically templated layered neptunyl(VI) phosphate $(\text{NpO}_2)_3(\text{PO}_4)_2(\text{Terpy})$

Lei Zhang,<sup>\*a,b,c</sup> Yu Wang,<sup>b,d</sup> Mengyu Xu,<sup>e</sup> Alex M. Kokot,<sup>a</sup> Jie Qiu,<sup>a,f</sup> and Peter C.  
Burns<sup>a,e</sup>

<sup>a</sup> Department of Civil and Environmental Engineering and Earth Sciences, University  
of Notre Dame, Notre Dame, IN 46556, USA.

<sup>b</sup> Zhejiang Key Laboratory of Data-Driven High-Safety Energy Materials and  
Applications, Ningbo Key Laboratory of Special Energy Materials and Chemistry,  
Ningbo Institute of Materials Technology and Engineering, Chinese Academy of  
Sciences, Ningbo 315201, China.

<sup>c</sup> Qianwan Institute of CNITECH, Ningbo 315336, China.

<sup>d</sup> University of Chinese Academy of Sciences, Beijing 100049, China.

<sup>e</sup> Department of Chemistry and Biochemistry, University of Notre Dame, Notre Dame,  
IN 46556, USA.

<sup>f</sup> School of Energy and Power Engineering, Xi'an Jiaotong University, Xi'an 710049,  
China.

\* Corresponding author: [zhangleiucd@nimte.ac.cn](mailto:zhangleiucd@nimte.ac.cn).

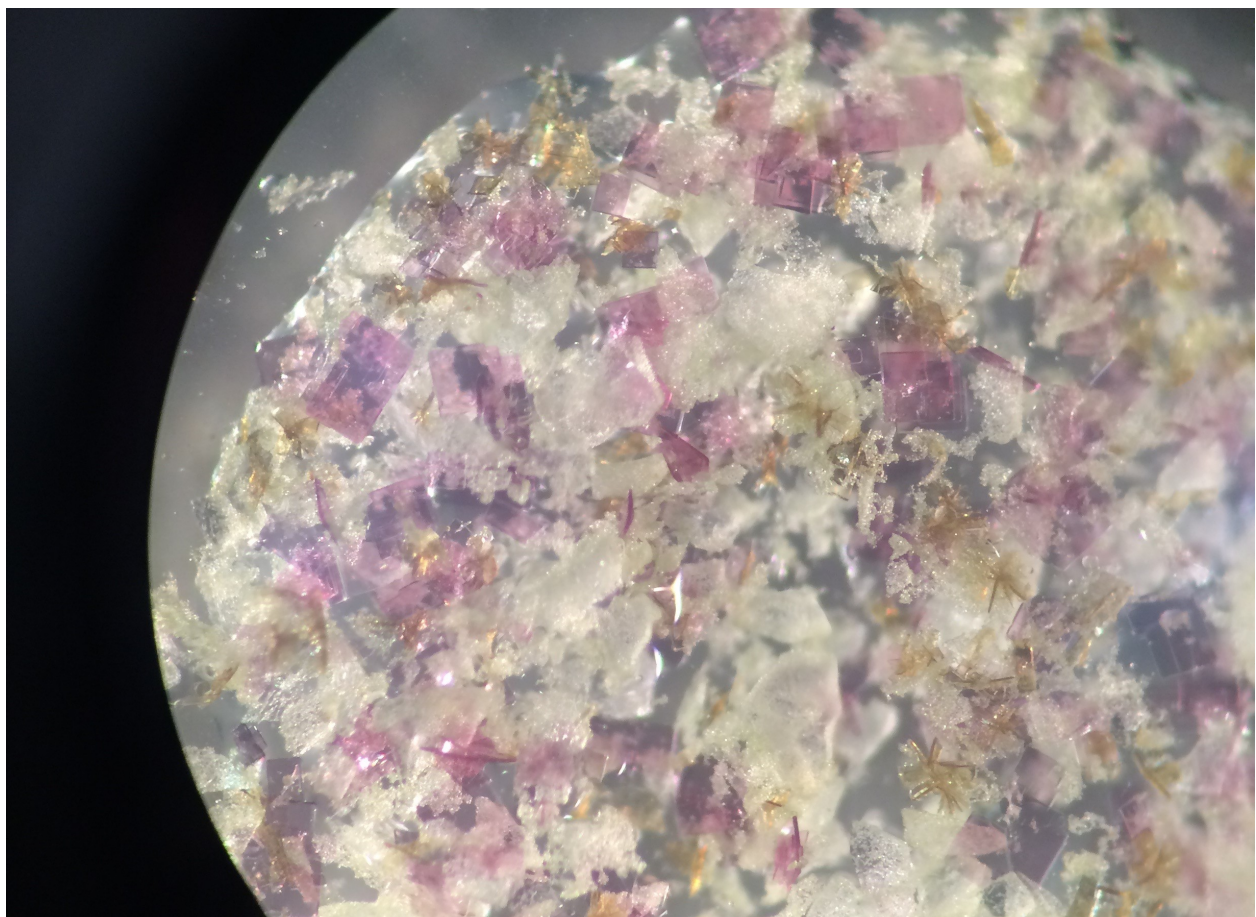

**Fig. S1.** Brown plate crystal agglomerates of  $(\text{NpO}_2)_3(\text{PO}_4)_2(\text{Terpy})$ , and pink square crystals of  $\text{K}[(\text{NpO}_2)(\text{PO}_4)](\text{H}_2\text{O})_3$ , formed from the hydrothermal reactions.

**Table S1.** Crystallographic data and details of the structure refinement for  $(\text{NpO}_2)_3(\text{PO}_4)_2(\text{Terpy})$ .

|                                               |                                                                          |
|-----------------------------------------------|--------------------------------------------------------------------------|
| Chemical formula                              | $\text{C}_{15}\text{H}_{11}\text{N}_3\text{Np}_3\text{O}_{14}\text{P}_2$ |
| Formula weight                                | 1230.36                                                                  |
| Temperature/K                                 | 298                                                                      |
| Crystal system                                | Orthorhombic                                                             |
| Space group                                   | $\text{Pca}2_1$                                                          |
| $a/\text{\AA}$                                | 13.9944(8)                                                               |
| $b/\text{\AA}$                                | 12.1989(7)                                                               |
| $c/\text{\AA}$                                | 13.1277(8)                                                               |
| $\alpha/^\circ$                               | $\alpha = \beta = \gamma = 90$                                           |
| Volume/ $\text{\AA}^3$                        | 2241.1(2)                                                                |
| Z                                             | 4                                                                        |
| $\rho_{\text{calc}}/\text{g/cm}^3$            | 3.647                                                                    |
| $\mu/\text{mm}^{-1}$                          | 14.031                                                                   |
| F(000)                                        | 543.0                                                                    |
| Crystal size/ $\text{mm}^3$                   | 0.020×0.020×0.002                                                        |
| Radiation                                     | $\text{MoK}\alpha$ ( $\lambda = 0.71073$ )                               |
| Index ranges                                  | $-18 \leq h \leq 18, -15 \leq k \leq 15, -17 \leq l \leq 17$             |
| Reflections collected                         | 25503                                                                    |
| Independent reflections                       | 5463 [ $R_{\text{int}} = 0.0302, R_{\text{sigma}} = 0.0236$ ]            |
| Data/restraints/parameters                    | 5463/1/299                                                               |
| Goodness-of-fit on $F^2$                      | 1.070                                                                    |
| Final R indexes [ $I \geq 2\sigma(I)$ ]       | $R1 = 0.0176, wR2 = 0.0453$                                              |
| Final R indexes [all data]                    | $R1 = 0.0180, wR2 = 0.0456$                                              |
| Largest diff. peak/hole / $e \text{\AA}^{-3}$ | 2.03/-1.29                                                               |
| Flack parameter                               | 0.365(18)                                                                |

**Table S2.** Atomic parameters and displacement parameters for  $(\text{NpO}_2)_3(\text{PO}_4)_2(\text{Terpy})$ .

| Atom | x           | y          | z          | U(eq)    |
|------|-------------|------------|------------|----------|
| Np1  | 15122.1(2)  | 262.4(3)   | 4817.4(2)  | 11.16(6) |
| Np2  | 12616.6(2)  | 11.3(2)    | 3351.7(2)  | 10.79(7) |
| Np3  | 16162.4(2)  | 3119.5(2)  | 1533.5(3)  | 16.88(7) |
| P1   | 15096.1(12) | 579.2(19)  | 2423.6(14) | 10.7(4)  |
| P2   | 12676.5(12) | -496.3(15) | 5708.0(13) | 11.0(3)  |
| O1   | 13456(4)    | 7(4)       | 5006(5)    | 16.6(11) |
| O8   | 12505(4)    | 230(4)     | 1638(5)    | 17.7(12) |
| O2   | 15005(4)    | 240(5)     | 6559(5)    | 18.5(13) |
| O3   | 14246(3)    | 482(4)     | 3169(4)    | 16.2(10) |
| O4   | 14997(4)    | 1691(5)    | 4887(5)    | 22.6(12) |
| O5   | 10946(3)    | -311(5)    | 3131(4)    | 16.0(11) |
| O6   | 16799(3)    | 500(4)     | 4988(4)    | 15.7(10) |
| O9   | 12331(4)    | 1396(4)    | 3535(4)    | 22.4(12) |
| O7   | 15266(4)    | -1159(5)   | 4738(5)    | 24.5(12) |
| O10  | 12942(4)    | -1363(4)   | 3189(4)    | 22.0(12) |
| O11  | 15180(4)    | 1738(5)    | 2017(4)    | 20.8(12) |
| O12  | 17060(4)    | 1651(5)    | 1013(4)    | 22.2(12) |
| O13  | 15625(5)    | 3211(5)    | 321(5)     | 28.6(13) |
| O15  | 16702(4)    | 3144(5)    | 2735(5)    | 28.2(14) |
| N1   | 14721(3)    | 4061(4)    | 2434(4)    | 25.1(15) |
| C1   | 14658(4)    | 5197(4)    | 2486(5)    | 23.3(17) |
| C2   | 13875(4)    | 5687(3)    | 2950(5)    | 32(2)    |
| C3   | 13154(4)    | 5042(5)    | 3363(5)    | 36(2)    |
| C4   | 13216(4)    | 3906(4)    | 3311(5)    | 36(2)    |
| C5   | 13999(4)    | 3415(3)    | 2847(5)    | 34(2)    |
| N2   | 16165(4)    | 5251(3)    | 1599(5)    | 23.0(14) |
| C6   | 16919(3)    | 5831(4)    | 1170(4)    | 24.0(17) |
| C7   | 16935(4)    | 6969(4)    | 1223(5)    | 32(2)    |
| C8   | 16196(4)    | 7527(3)    | 1706(5)    | 35(2)    |
| C9   | 15442(4)    | 6947(4)    | 2135(5)    | 35(2)    |
| C10  | 15426(3)    | 5809(4)    | 2082(5)    | 26.6(18) |
| N3   | 17600(3)    | 4093(4)    | 743(5)     | 25.7(15) |
| C11  | 18311(4)    | 3457(3)    | 298(5)     | 32(2)    |
| C12  | 19087(3)    | 3957(4)    | -170(5)    | 33.5(19) |
| C13  | 19154(4)    | 5093(4)    | -193(5)    | 34(2)    |
| C14  | 18444(4)    | 5730(3)    | 252(5)     | 32(2)    |
| C15  | 17667(4)    | 5230(4)    | 720(5)     | 28(2)    |

**Table S3.** Selected interatomic distances and angles in (NpO<sub>2</sub>)<sub>3</sub>(PO<sub>4</sub>)<sub>2</sub>(Terpy).

|                      | Length/<br>Å |                         | Angle/°    |                                       | Angle/°    |                                      | Angle/°    |
|----------------------|--------------|-------------------------|------------|---------------------------------------|------------|--------------------------------------|------------|
| Np1-O7               | 1.749(5)     | O7-Np1-O4               | 179.0(3)   | O9-Np2-O6 <sup>2</sup>                | 91.0(2)    | O12 <sup>4</sup> -P2-O6 <sup>2</sup> | 110.6(3)   |
| Np1-O4               | 1.753(6)     | O7-Np1-O2               | 93.2(3)    | O8-Np2-O6 <sup>2</sup>                | 147.65(18) | O8 <sup>5</sup> -P2-O6 <sup>2</sup>  | 110.9(3)   |
| Np1-O2               | 2.292(7)     | O4-Np1-O2               | 87.3(3)    | O3-Np2-O6 <sup>2</sup>                | 125.89(17) | O12 <sup>4</sup> -P2-O1              | 110.8(3)   |
| Np1-O1               | 2.365(5)     | O7-Np1-O1               | 89.4(2)    | O5-Np2-O6 <sup>2</sup>                | 67.49(17)  | O8 <sup>5</sup> -P2-O1               | 111.1(3)   |
| Np1-O6               | 2.376(4)     | O4-Np1-O1               | 91.5(2)    | O1-Np2-O6 <sup>2</sup>                | 57.59(16)  | O6 <sup>2</sup> -P2-O1               | 101.3(3)   |
| Np1-O5 <sup>1</sup>  | 2.497(5)     | O2-Np1-O1               | 79.8(2)    | O10-Np2-P2                            | 85.67(19)  | O12 <sup>4</sup> -P2-Np2             | 116.7(2)   |
| Np1-O3               | 2.501(5)     | O7-Np1-O6               | 90.7(2)    | O9-Np2-P2                             | 93.47(19)  | O8 <sup>5</sup> -P2-Np2              | 131.6(2)   |
| Np1-P1               | 3.1664(19)   | O4-Np1-O6               | 88.4(2)    | O8-Np2-P2                             | 174.84(14) | O6 <sup>2</sup> -P2-Np2              | 51.80(19)  |
| Np1-Np2 <sup>1</sup> | 4.0001(4)    | O2-Np1-O6               | 88.74(18)  | O3-Np2-P2                             | 96.98(13)  | O1-P2-Np2                            | 50.2(2)    |
| Np1-Np2              | 4.0113(4)    | O1-Np1-O6               | 168.6(2)   | O5-Np2-P2                             | 96.46(14)  | P2-O1-Np1                            | 143.7(3)   |
| Np2-O10              | 1.751(5)     | O7-Np1-O5 <sup>1</sup>  | 85.3(2)    | O1-Np2-P2                             | 28.94(12)  | P2-O1-Np2                            | 100.8(2)   |
| Np2-O9               | 1.753(5)     | O4-Np1-O5 <sup>1</sup>  | 93.9(2)    | O6 <sup>2</sup> -Np2-P2               | 28.98(11)  | Np1-O1-Np2                           | 112.1(2)   |
| Np2-O8               | 2.270(6)     | O2-Np1-O5 <sup>1</sup>  | 156.57(17) | O10-Np2-Np1 <sup>2</sup>              | 101.85(18) | P2 <sup>6</sup> -O8-Np2              | 137.2(3)   |
| Np2-O3               | 2.364(5)     | O1-Np1-O5 <sup>1</sup>  | 123.5(2)   | O9-Np2-Np1 <sup>2</sup>               | 79.35(18)  | P1 <sup>4</sup> -O2-Np1              | 139.5(4)   |
| Np2-O5               | 2.388(5)     | O6-Np1-O5 <sup>1</sup>  | 67.93(17)  | O8-Np2-Np1 <sup>2</sup>               | 115.22(14) | P1-O3-Np2                            | 145.7(3)   |
| Np2-O1               | 2.469(6)     | O7-Np1-O3               | 96.4(2)    | O3-Np2-Np1 <sup>2</sup>               | 155.65(12) | P1-O3-Np1                            | 100.3(2)   |
| Np2-O6 <sup>2</sup>  | 2.513(5)     | O4-Np1-O3               | 83.7(2)    | O5-Np2-Np1 <sup>2</sup>               | 35.93(13)  | Np2-O3-Np1                           | 111.04(19) |
| Np2-P2               | 3.1558(18)   | O2-Np1-O3               | 146.01(17) | O1-Np2-Np1 <sup>2</sup>               | 89.54(12)  | P1 <sup>2</sup> -O5-Np2              | 149.5(3)   |
| Np2-Np1 <sup>2</sup> | 4.0001(4)    | O1-Np1-O3               | 67.77(18)  | O6 <sup>2</sup> -Np2-Np1 <sup>2</sup> | 33.97(10)  | P1 <sup>2</sup> -O5-Np1 <sup>2</sup> | 100.5(2)   |
| Np3-O15              | 1.749(6)     | O6-Np1-O3               | 123.55(17) | P2-Np2-Np1 <sup>2</sup>               | 62.31(3)   | Np2-O5-Np1 <sup>2</sup>              | 109.9(2)   |
| Np3-O13              | 1.764(6)     | O5 <sup>1</sup> -Np1-O3 | 57.10(16)  | O10-Np2-Np1                           | 84.52(17)  | P2 <sup>1</sup> -O6-Np1              | 147.1(3)   |
| Np3-O11              | 2.265(6)     | O7-Np1-P1               | 93.6(2)    | O9-Np2-Np1                            | 93.43(18)  | P2 <sup>1</sup> -O6-Np2 <sup>1</sup> | 99.2(2)    |
| Np3-O12              | 2.292(5)     | O4-Np1-P1               | 85.9(2)    | O8-Np2-Np1                            | 121.78(14) | Np1-O6-Np2 <sup>1</sup>              | 109.80(18) |
| Np3-N3               | 2.557(4)     | O2-Np1-P1               | 172.10(15) | O3-Np2-Np1                            | 35.59(12)  | P1-O11-Np3                           | 147.1(4)   |
| Np3-N2               | 2.602(3)     | O1-Np1-P1               | 96.24(15)  | O5-Np2-Np1                            | 157.87(13) | P2 <sup>3</sup> -O12-Np3             | 160.4(4)   |
| Np3-N1               | 2.605(4)     | O6-Np1-P1               | 95.17(13)  | O1-Np2-Np1                            | 33.11(12)  | C1-N1-C5                             | 120        |
| P1-O11               | 1.516(6)     | O5 <sup>1</sup> -Np1-P1 | 28.66(11)  | O6 <sup>2</sup> -Np2-Np1              | 90.38(10)  | C1-N1-Np3                            | 120.7(2)   |

|                     |          |                                       |             |                                     |             |             |          |
|---------------------|----------|---------------------------------------|-------------|-------------------------------------|-------------|-------------|----------|
| P1-O2 <sup>3</sup>  | 1.519(6) | O3-Np1-P1                             | 28.68(11)   | P2-Np2-Np1                          | 61.42(3)    | C5-N1-Np3   | 119.3(2) |
| P1-O5 <sup>1</sup>  | 1.544(5) | O7-Np1-Np2 <sup>1</sup>               | 77.76(19)   | Np1 <sup>2</sup> -Np2-Np1           | 122.580(11) | N1-C1-C2    | 120      |
| P1-O3               | 1.545(5) | O4-Np1-Np2 <sup>1</sup>               | 101.24(18)  | O15-Np3-O13                         | 175.4(2)    | N1-C1-C10   | 117.5(4) |
| P2-O12 <sup>4</sup> | 1.511(6) | O2-Np1-Np2 <sup>1</sup>               | 122.76(14)  | O15-Np3-O11                         | 91.2(3)     | C2-C1-C10   | 122.5(4) |
| P2-O8 <sup>5</sup>  | 1.530(6) | O1-Np1-Np2 <sup>1</sup>               | 154.12(14)  | O13-Np3-O11                         | 92.3(3)     | C3-C2-C1    | 120      |
| P2-O6 <sup>2</sup>  | 1.549(5) | O6-Np1-Np2 <sup>1</sup>               | 36.23(12)   | O15-Np3-O12                         | 92.6(2)     | C2-C3-C4    | 120      |
| P2-O1               | 1.555(5) | O5 <sup>1</sup> -Np1-Np2 <sup>1</sup> | 34.14(11)   | O13-Np3-O12                         | 90.8(2)     | C5-C4-C3    | 120      |
| O8-P2 <sup>6</sup>  | 1.530(6) | O3-Np1-Np2 <sup>1</sup>               | 91.17(11)   | O11-Np3-O12                         | 80.5(2)     | C4-C5-N1    | 120      |
| O2-P1 <sup>4</sup>  | 1.519(6) | P1-Np1-Np2 <sup>1</sup>               | 62.79(3)    | O15-Np3-N3                          | 91.1(3)     | C6-N2-C10   | 120      |
| O5-P1 <sup>2</sup>  | 1.544(5) | O7-Np1-Np2                            | 89.8(2)     | O13-Np3-N3                          | 86.6(3)     | C6-N2-Np3   | 119.8(3) |
| O5-Np1 <sup>2</sup> | 2.497(5) | O4-Np1-Np2                            | 90.78(18)   | O11-Np3-N3                          | 159.52(18)  | C10-N2-Np3  | 120.2(3) |
| O6-P2 <sup>1</sup>  | 1.549(5) | O2-Np1-Np2                            | 114.52(14)  | O12-Np3-N3                          | 79.09(18)   | N2-C6-C7    | 120      |
| O6-Np2 <sup>1</sup> | 2.513(5) | O1-Np1-Np2                            | 34.77(14)   | O15-Np3-N2                          | 87.3(2)     | N2-C6-C15   | 118.0(4) |
| O12-P2 <sup>3</sup> | 1.511(6) | O6-Np1-Np2                            | 156.67(12)  | O13-Np3-N2                          | 88.1(2)     | C7-C6-C15   | 122.0(4) |
| N1-C1               | 1.39     | O5 <sup>1</sup> -Np1-Np2              | 88.87(11)   | O11-Np3-N2                          | 137.31(19)  | C8-C7-C6    | 120      |
| N1-C5               | 1.39     | O3-Np1-Np2                            | 33.37(11)   | O12-Np3-N2                          | 142.21(18)  | C7-C8-C9    | 120      |
| C1-C2               | 1.39     | P1-Np1-Np2                            | 61.52(3)    | N3-Np3-N2                           | 63.14(16)   | C8-C9-C10   | 120      |
| C1-C10              | 1.412(5) | Np2 <sup>1</sup> -Np1-Np2             | 121.717(10) | O15-Np3-N1                          | 85.3(2)     | C9-C10-N2   | 120      |
| C2-C3               | 1.39     | O10-Np2-O9                            | 177.9(3)    | O13-Np3-N1                          | 92.9(2)     | C9-C10-C1   | 121.4(4) |
| C3-C4               | 1.39     | O10-Np2-O8                            | 90.6(2)     | O11-Np3-N1                          | 74.38(19)   | N2-C10-C1   | 118.5(4) |
| C4-C5               | 1.39     | O9-Np2-O8                             | 90.4(2)     | O12-Np3-N1                          | 154.72(18)  | C11-N3-C15  | 120      |
| N2-C6               | 1.39     | O10-Np2-O3                            | 88.3(2)     | N3-Np3-N1                           | 126.09(14)  | C11-N3-Np3  | 118.3(2) |
| N2-C10              | 1.39     | O9-Np2-O3                             | 90.0(2)     | N2-Np3-N1                           | 62.97(16)   | C15-N3-Np3  | 121.7(2) |
| C6-C7               | 1.39     | O8-Np2-O3                             | 86.42(18)   | O11-P1-O2 <sup>3</sup>              | 110.9(3)    | C12-C11-N3  | 120      |
| C6-C15              | 1.408(5) | O10-Np2-O5                            | 94.7(2)     | O11-P1-O5 <sup>1</sup>              | 110.5(3)    | C11-C12-C13 | 120      |
| C7-C8               | 1.39     | O9-Np2-O5                             | 87.3(2)     | O2 <sup>3</sup> -P1-O5 <sup>1</sup> | 112.5(3)    | C14-C13-C12 | 120      |
| C8-C9               | 1.39     | O8-Np2-O5                             | 80.31(19)   | O11-P1-O3                           | 110.8(3)    | C13-C14-C15 | 120      |
| C9-C10              | 1.39     | O3-Np2-O5                             | 166.42(19)  | O2 <sup>3</sup> -P1-O3              | 110.6(3)    | C14-C15-N3  | 120      |
| N3-C11              | 1.39     | O10-Np2-O1                            | 88.9(2)     | O5 <sup>1</sup> -P1-O3              | 101.3(3)    | C14-C15-C6  | 122.6(4) |
| N3-C15              | 1.39     | O9-Np2-O1                             | 89.4(2)     | O11-P1-Np1                          | 117.6(2)    | N3-C15-C6   | 117.4(4) |

|                                                                                                                                                                                       |      |                             |            |                                      |           |  |  |
|---------------------------------------------------------------------------------------------------------------------------------------------------------------------------------------|------|-----------------------------|------------|--------------------------------------|-----------|--|--|
| C11-C12                                                                                                                                                                               | 1.39 | O8-Np2-O1                   | 154.75(18) | O2 <sup>3</sup> -P1-Np1              | 131.5(3)  |  |  |
| C12-C13                                                                                                                                                                               | 1.39 | O3-Np2-O1                   | 68.33(17)  | O5 <sup>1</sup> -P1-Np1              | 50.8(2)   |  |  |
| C13-C14                                                                                                                                                                               | 1.39 | O5-Np2-O1                   | 124.89(19) | O3-P1-Np1                            | 51.00(19) |  |  |
| C14-C15                                                                                                                                                                               | 1.39 | O10-Np2-<br>O6 <sup>2</sup> | 89.1(2)    | O12 <sup>4</sup> -P2-O8 <sup>5</sup> | 111.6(3)  |  |  |
| Symmetry codes: <sup>1</sup> 1/2+X,-Y,+Z; <sup>2</sup> -1/2+X,-Y,+Z; <sup>3</sup> 3-X,-Y,-1/2+Z; <sup>4</sup> 3-X,-Y,1/2+Z; <sup>5</sup> 5/2-X,+Y,1/2+Z; <sup>6</sup> 5/2-X,+Y,-1/2+Z |      |                             |            |                                      |           |  |  |

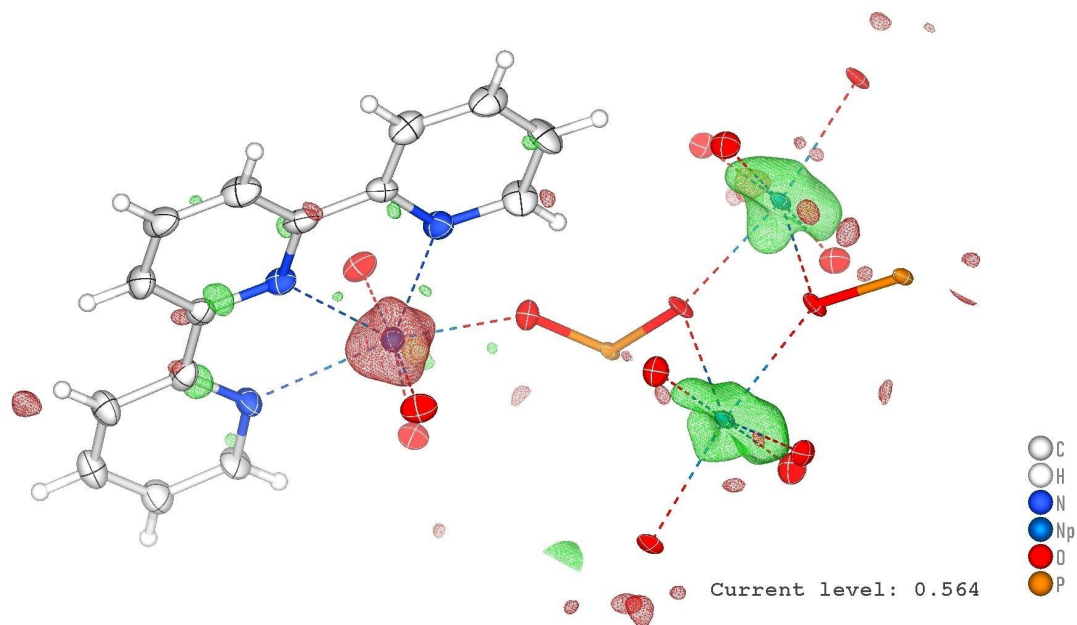

**Fig. S2.** Residual density plot of  $(\text{NpO}_2)_3(\text{PO}_4)_2(\text{Terpy})$ .

When refining the occupancies of Np freely, Np1 and Np2 refine to an occupancy of 1, while Np3 refines to an occupancy of 95%. This may be the result of a lower electron density surrounding of Np3, which is bonded to terpyridine ( $\text{C}_{15}\text{H}_{11}\text{N}_3$ ) and two  $\text{PO}_4$  tetrahedra. Unlike Np1 and Np2, they form a  $(\text{NpO}_2)_2(\text{PO}_4)_2^{2-}$  chain by edge-sharing.



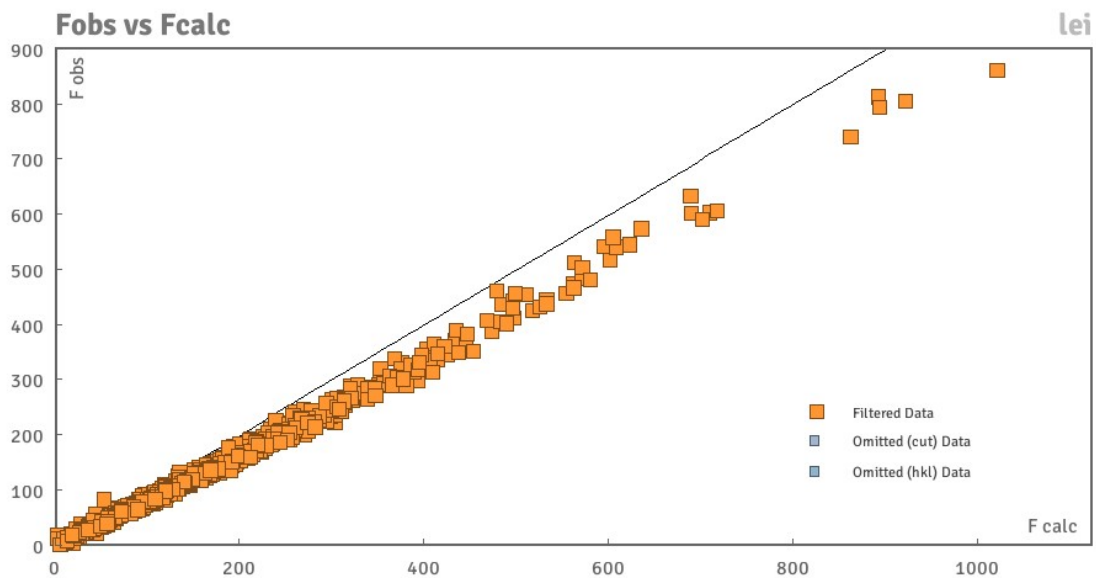

**Fig. S3.** Fobs vs Fcalc plot of  $(\text{NpO}_2)_3(\text{PO}_4)_2(\text{Terpy})$ .

All reflections are slightly weaker than expected, but none of them has a  $|\text{Error/esd}|$  value larger than 10. This might be the result of a systematic deviation of the F factors involving Np, which we don't have a sound explanation for the observed.

**Table S4.** Bond valence calculations of Np in  $(\text{NpO}_2)_3(\text{PO}_4)_2(\text{Terpy})$ .

|          | Np(1)  | Np(2)  | Np(3)  |
|----------|--------|--------|--------|
| O(1)     | 1.7487 | 1.7503 | 1.7490 |
| O(2)     | 1.7539 | 1.7524 | 1.7640 |
| O(3)     | 2.2923 | 2.2708 | 2.2656 |
| O(4)     | 2.3653 | 2.3636 | 2.2921 |
| O(5)     | 2.3751 | 2.3884 |        |
| O(6)     | 2.4968 | 2.4691 |        |
| O(7)     | 2.5015 | 2.5125 |        |
| N(1)     |        |        | 2.5563 |
| N(2)     |        |        | 2.6016 |
| N(3)     |        |        | 2.6049 |
| $\Sigma$ | 5.783  | 5.811  | 5.722  |

Note: Bond valence calculation for Np in  $(\text{NpO}_2)_3(\text{PO}_4)_2(\text{Terpy})$  using bond valences parameters  $R_{ij} = 2.022 \text{ \AA}$  and  $b = 0.523 \text{ \AA}$  for Np-O<sup>1</sup>. The parameters related to Np-N were not investigated, so the bond valences parameters  $R_{ij} = 2.24 \text{ \AA}$  and  $b = 0.37 \text{ \AA}$  of the similar U-N were used instead<sup>2</sup>.

### Crystal structure of $(\text{NpO}_2)_3(\text{PO}_4)_2(\text{Terpy})$

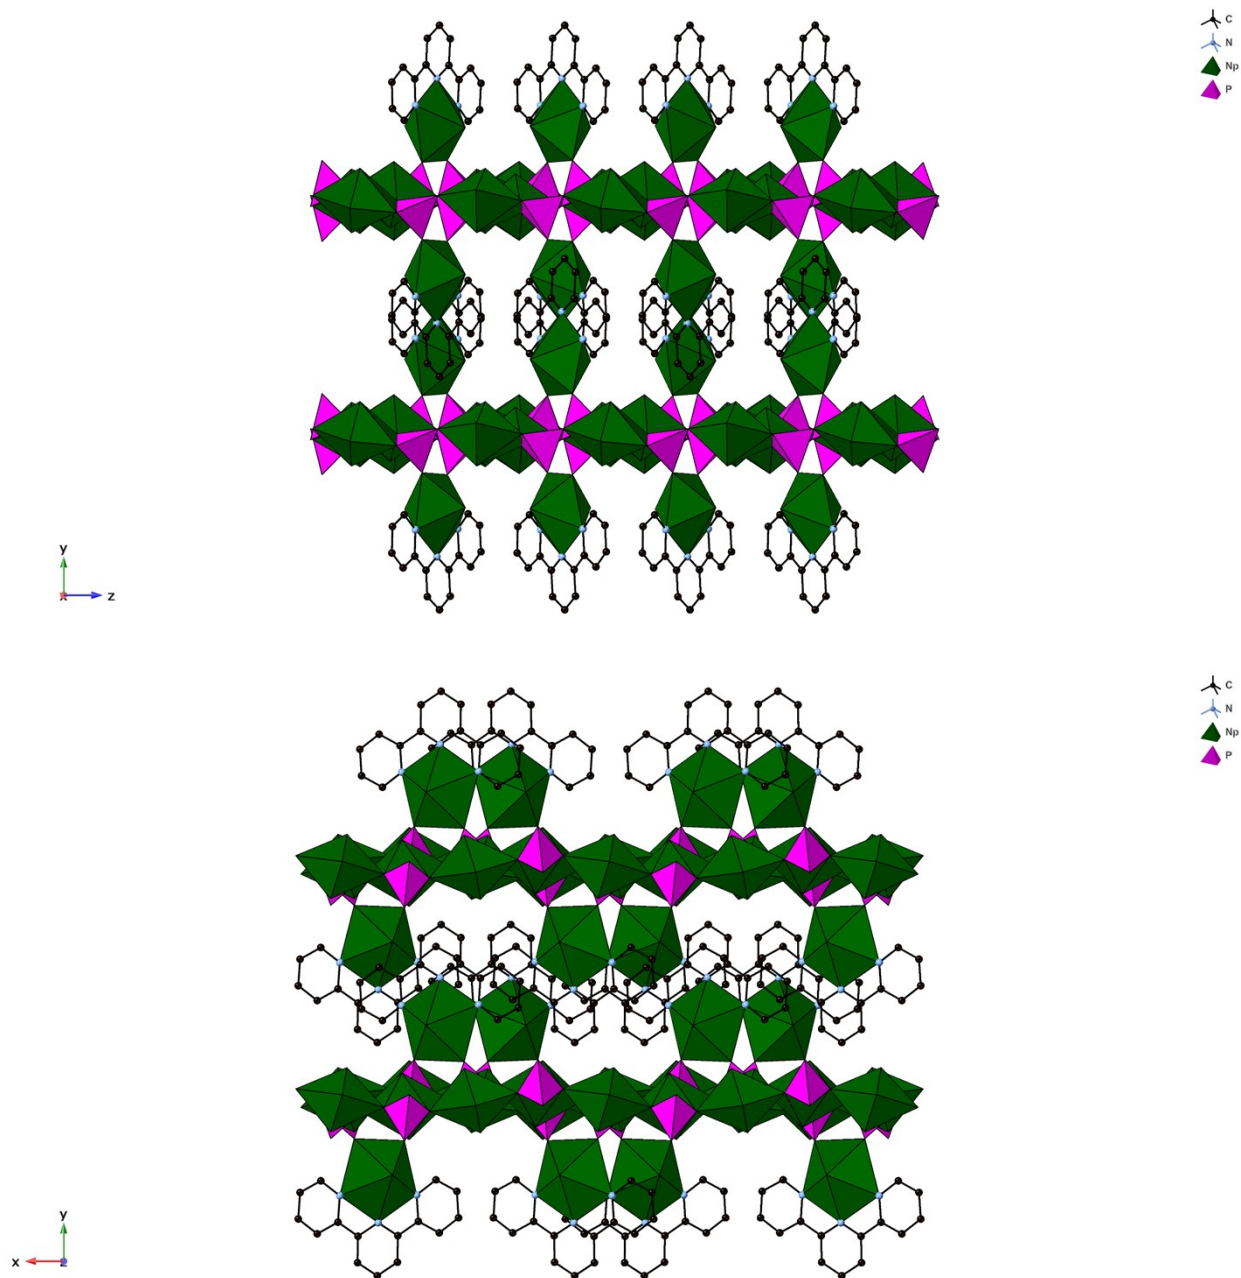

**Fig. S4.** Crystal structure of  $(\text{NpO}_2)_3(\text{PO}_4)_2(\text{Terpy})$  as viewed down (a) the crystallographic  $a$  axis, and (b) the crystallographic  $c$  axis.

## Powder X-ray Diffraction (PXRD)

The  $(\text{UO}_2)_3(\text{PO}_4)_2(\text{Terpy})$  powders were washed with de-ionized  $\text{H}_2\text{O}$ , dried, and ground. The dried powders were then characterized by powder X-ray diffraction using a D8 ADVANCE X-ray diffractometer with a  $\text{Cu K}\alpha$  source ( $\lambda = 1.54056 \text{ \AA}$ ) and a Lynxeye detector.

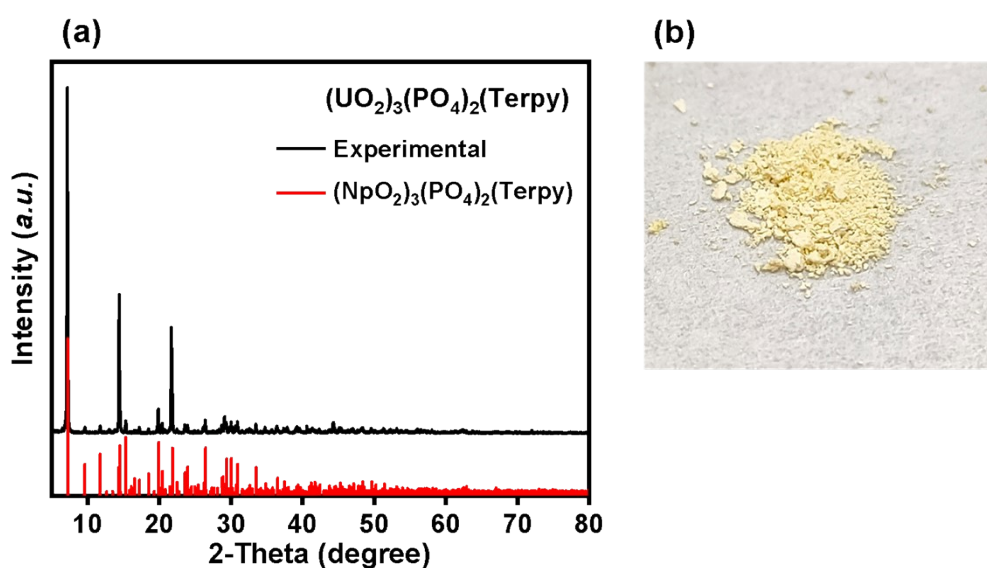

**Fig. S5.** (a) Experimental (black) powder diffraction pattern of  $(\text{UO}_2)_3(\text{PO}_4)_2(\text{Terpy})$ , and the theoretical diffraction pattern (red) calculated using Crystallmaker software from  $(\text{NpO}_2)_3(\text{PO}_4)_2(\text{Terpy})$  single crystal structure; (b) Optical images of  $(\text{UO}_2)_3(\text{PO}_4)_2(\text{Terpy})$  powder sample.

## Energy-Dispersive Spectroscopy (EDS)

The elements in the  $(\text{UO}_2)_3(\text{PO}_4)_2(\text{Terpy})$  powder sample was analyzed using data collected on a ZEISS GeminiSEM 300 equipped with an EDS detector. SEM imaging shows a scaly structure on the surface of the powder sample. EDS verified the presence of U, P, N, O (except for H which cannot be detected by the instrument).

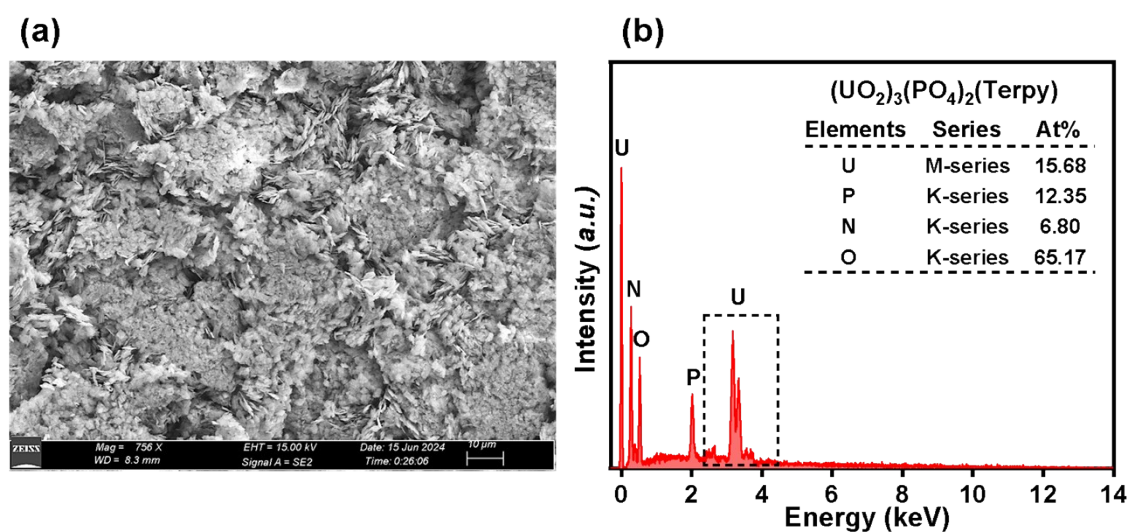

**Fig. S6.** SEM image of powder sample of  $(\text{UO}_2)_3(\text{PO}_4)_2(\text{Terpy})$  (a) and EDS analysis results (b).

**Table S5.** The semi-quant results of  $(\text{UO}_2)_3(\text{PO}_4)_2(\text{Terpy})$  powder by EDS analysis. For convenience of comparison, all elemental ratios are divided by U=1.

| At%                                            | U    | P    | N    | O    |
|------------------------------------------------|------|------|------|------|
| $(\text{UO}_2)_3(\text{PO}_4)_2(\text{Terpy})$ | 1.00 | 0.79 | 0.43 | 4.16 |

## Fourier Transform Infrared (FTIR) spectroscopy

FTIR spectrum of  $(\text{UO}_2)_3(\text{PO}_4)_2(\text{Terpy})$  samples were measured at room temperature using Nicolet iS20 FTIR spectrometer (compaction of samples in tablets with KBr), over the ranges of  $450 - 2000 \text{ cm}^{-1}$  (resolution  $4 \text{ cm}^{-1}$ , 32 scans).

In FTIR spectrum of uranyl ion within the range of  $700 - 1000 \text{ cm}^{-1}$  is shown in Figure S5, the typical stretching vibration of  $(\text{UO}_2)^{2+}$  units can be observed at  $\sim 930 \text{ cm}^{-1}$ <sup>[3-5]</sup>. It is also known that the band at  $1000 - 1170 \text{ cm}^{-1}$  is characteristic of  $(\text{PO}_4)^{3-}$  ligands<sup>6-8</sup>.

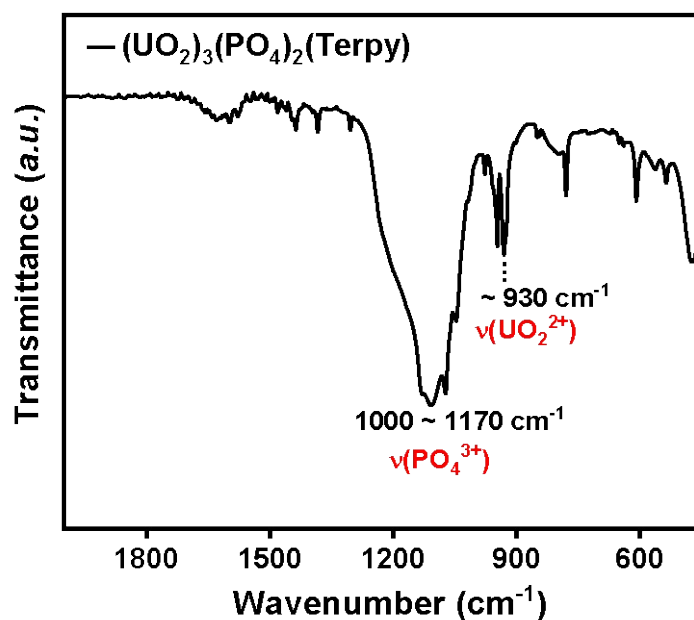

**Fig. S7.** FTIR spectrum for  $(\text{UO}_2)_3(\text{PO}_4)_2(\text{Terpy})$  shown over  $450\text{-}2000 \text{ cm}^{-1}$ .

## UV-Vis Diffuse Reflectance Spectroscopy

UV-Vis diffuse reflectance spectra of  $(\text{UO}_2)_3(\text{PO}_4)_2(\text{Terpy})$  samples were collected by a Hitachi UH-4150 UV-Vis spectrophotometer for the range of 200 – 800 nm. The four typical bands of the uranyl group located at 403, 415, 427 and 441 nm are present in the spectrum of  $(\text{UO}_2)_3(\text{PO}_4)_2(\text{Terpy})$  (vs 404, 416, 429 and 444 nm which are the peak value for the red line portion of the structure  $\text{U}(\text{UO}_2)(\text{PO}_4)_2$  in Figure S6)<sup>9</sup>, suggesting its formula being  $(\text{U}^{\text{VI}}\text{O}_2)_3(\text{PO}_4)_2(\text{Terpy})$ .

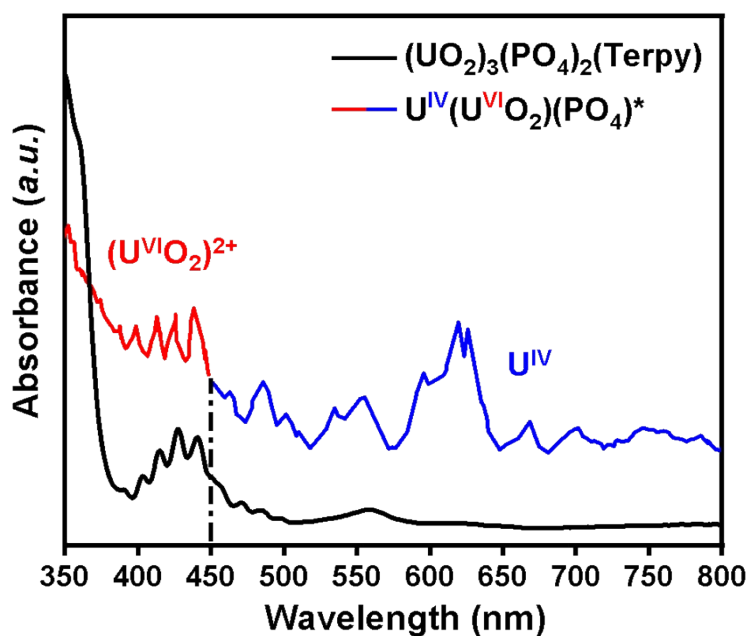

**Fig. S8.** UV-visible absorption spectra of  $(\text{UO}_2)_3(\text{PO}_4)_2(\text{Terpy})$  (black) and  $\text{U}(\text{UO}_2)(\text{PO}_4)_2$  (characteristic peaks for  $\text{U}^{\text{IV}}$  (blue) above 450 nm is the, and uranyl ions (red) below 450 nm).

## Confocal Micro-Raman Spectroscopy

Raman spectroscopic studies of  $(\text{UO}_2)_3(\text{PO}_4)_2(\text{Terpy})$  were carried out using a LabRAM HR Evolution instrument with an argon laser working at 532 nm output. Spectra were recorded in the range of 200 – 2000  $\text{cm}^{-1}$ . A tentative assignment is provided for most of the experimental bands, whereas the non-assigned frequencies are listed in Figure S7 and Table S6. As shown in the experimental spectra, the wavenumber region involves an overlap of several vibrational modes, and these bands concern mainly: the bands at 1400 to 1600  $\text{cm}^{-1}$  originating from the  $\nu(\text{C}=\text{C})$  and  $\nu(\text{C}=\text{N})$  stretching vibrations of the pyridine rings; the band at 1341  $\text{cm}^{-1}$  belonging to the stretching vibration  $\nu(\text{C}-\text{C})$  between the rings; the band at 1294  $\text{cm}^{-1}$  also resulting from  $\nu(\text{C}=\text{C})$  and  $\nu(\text{C}=\text{N})$  vibrations, and combinatory vibrations of in-plane deformation vibrations  $\delta(=\text{C}-\text{H})$  of the pyridine rings; bands at 1011 and 424  $\text{cm}^{-1}$  attributed to the  $(\text{PO}_4)^{3-}$  antisymmetric stretching and bending vibrations, respectively; a low intensity band observed at 798  $\text{cm}^{-1}$  attributed to the symmetric stretching vibration of the  $(\text{UO}_2)^{2+}$  units; and in particular, the band at 865  $\text{cm}^{-1}$  probably assigned to the water libration mode<sup>3,6,10-14</sup>.



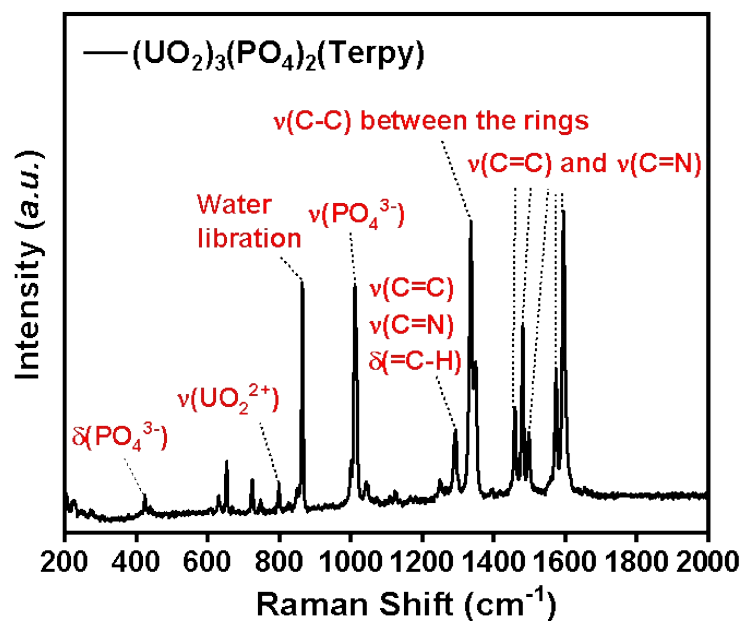

**Fig. S9.** Raman spectra for  $(\text{UO}_2)_3(\text{PO}_4)_2(\text{Terpy})$  shown over 200-2000  $\text{cm}^{-1}$ .

**Table S6.** Raman spectra assignments of  $(\text{UO}_2)_3(\text{PO}_4)_2(\text{Terpy})$  powder.

| Raman spectra    | Band assignments                                                                                 |
|------------------|--------------------------------------------------------------------------------------------------|
| 1599, 1574       | (C=C) and (C=N) of the pyridine rings stretching                                                 |
| 1498, 1480, 1458 |                                                                                                  |
| 1341             | (C-C) stretching between the rings                                                               |
| 1294             | Combinatory vibrations of (C=C) and (C=N) and (=C-H) in-plane deformation of the pyridine rings. |
| 1011             | $(\text{PO}_4)^{3-}$ antisymmetric stretching                                                    |
| 865              | Water libration                                                                                  |
| 798              | $(\text{UO}_2)^{2+}$ symmetric stretching                                                        |
| 424              | $(\text{PO}_4)^{3-}$ bending                                                                     |

## Optical properties

Fluorescence data of  $(\text{UO}_2)_3(\text{PO}_4)_2(\text{Terpy})$  powder were collected on a Hitachi F-4700 fluorescence spectrophotometer. The emission spectra were collected in the wavelength range of 450 – 600 nm at an excitation wavelength of 380 nm, and the results are shown in Figure S8. There are six major emission peaks between 450-600 nm at 488, 499, 507, 522, 547 and 573 nm, and the yellow powder displays the green luminescence typical of uranyl compounds under UV light<sup>15-19</sup>.

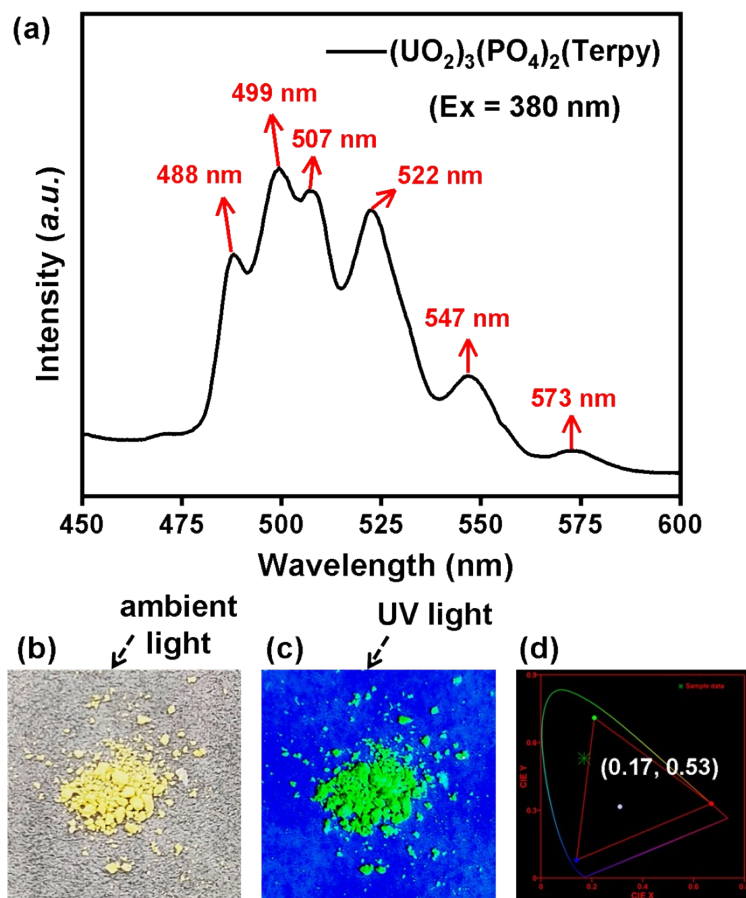

**Fig. S10.** (a) Fluorescence emission spectra of the  $(\text{UO}_2)_3(\text{PO}_4)_2(\text{Terpy})$  powder; images of the powder under ambient light (b) and UV light (c); and (d) the CIE chromaticity diagram of  $(\text{UO}_2)_3(\text{PO}_4)_2(\text{Terpy})$  with excitation at 380 nm.

## REFERENCES

- (1) Gagné, O. C.; Hawthorne, F. C. Comprehensive Derivation of Bond-Valence Parameters for Ion Pairs Involving Oxygen. *Acta Crystallogr B Struct Sci Cryst Eng Mater* **2015**, *71* (Pt 5), 562–578. <https://doi.org/10.1107/S2052520615016297>.
- (2) Brese, N. E.; O’Keeffe, M. Bond-Valence Parameters for Solids. *Acta Crystallographica Section B* **1991**, *47* (2), 192–197. <https://doi.org/10.1107/S0108768190011041>.
- (3) Vitova, T.; Pidchenko, I.; Schild, D.; Průžmann, T.; Montoya, V.; Fellhauer, D.; Gaona, X.; Bohnert, E.; Rothe, J.; Baker, R. J.; Geckeis, H. Competitive Reaction of Neptunium(V) and Uranium(VI) in Potassium–Sodium Carbonate-Rich Aqueous Media: Speciation Study with a Focus on High-Resolution X-Ray Spectroscopy. *Inorg. Chem.* **2020**, *59* (1), 8–22. <https://doi.org/10.1021/acs.inorgchem.9b02463>.
- (4) Andreev, G.; Budantseva, N.; Fedoseev, A. Crystal Structure and Spectral Properties of Np(VI) and U(VI) Methanesulfonates. *J Radioanal Nucl Chem* **2019**, *320* (2), 485–490. <https://doi.org/10.1007/s10967-019-06496-8>.
- (5) Prestianni, A.; Joubert, L.; Chagnes, A.; Cote, G.; Ohnet, M.-N.; Rabbe, C.; Charbonnel, M.-C.; Adamo, C. IR Fingerprints of U(VI) Nitrate Monoamides Complexes: A Joint Experimental and Theoretical Study. *J. Phys. Chem. A* **2010**, *114* (40), 10878–10884. <https://doi.org/10.1021/jp106467p>.
- (6) Stefanovsky, S. V.; Stefanovsky, O. I.; Kadyko, M. I. FTIR and Raman Spectroscopic Study of Sodium Aluminophosphate and Sodium Aluminum-Iron Phosphate Glasses Containing Uranium Oxides. *Journal of Non-Crystalline Solids* **2016**, *443*, 192–198. <https://doi.org/10.1016/j.jnoncrysol.2016.04.031>.
- (7) Shen, P.-P.; Wu, X.-H.; Ren, N.; Zhang, J.-J.; Wang, S.-P. Lanthanide Complexes with 2,3-Dimethoxybenzoic Acid and Terpyridine: Crystal Structures, Thermal Properties, and Antibacterial Activities. *Zeitschrift für anorganische und allgemeine Chemie*.
- (8) Corbridge, D. E. C.; Lowe, E. J. The Infra-Red Spectra of Some Inorganic Phosphorus Compounds. *J. Chem. Soc.* **1954**, No. 0, 493–502. <https://doi.org/10.1039/JR9540000493>.
- (9) Benard, P.; Louer, D.; Dacheux, N.; Brandel, V.; Genet, M. U(UO<sub>2</sub>)(PO<sub>4</sub>)<sub>2</sub>, a New Mixed-Valence Uranium Orthophosphate: Ab Initio Structure Determination from Powder Diffraction Data and Optical and X-Ray Photoelectron Spectra. *Chem. Mater.* **1994**, *6* (7), 1049–1058. <https://doi.org/10.1021/cm00043a029>.
- (10) Sánchez-Pastor, N.; Pinto, A. J.; Astilleros, J. M.; Fernández-Díaz, L.; Gonçalves, M. A. Raman Spectroscopic Characterization of a Synthetic, Non-Stoichiometric Cu–Ba Uranyl Phosphate. **2013**.
- (11) Hadrich, A.; Lautie, A.; Mhiri, T. Vibrational Study and Fluorescence Bands in the FT–Raman Spectra of Ca<sub>10-x</sub>Pb<sub>x</sub>(PO<sub>4</sub>)<sub>6</sub>(OH)<sub>2</sub> Compounds. *Spectrochimica Acta Part A* **2001**, *57*, 1673–1681.
- (12) Frost, R. L.; Čejka, J.; Ayoko, G. A.; Weier, M. A Raman Spectroscopic Study of the Uranyl Phosphate Mineral Bergenite. *Spectrochimica Acta Part A: Molecular and Biomolecular Spectroscopy* **2007**, *66* (4), 979–984. <https://doi.org/10.1016/j.saa.2006.04.036>.
- (13) Lines, A. M.; Hall, G. B.; Sinkov, S.; Levitskaia, T.; Gallagher, N.; Lumetta, G. J.; Bryan, S. A. Overcoming Oxidation State-Dependent Spectral Interferences: Online Monitoring of U(VI) Reduction to U(IV) via Raman and UV–Vis Spectroscopy. *Ind. Eng. Chem. Res.* **2020**, *59* (19), 8894–8901. <https://doi.org/10.1021/acs.iecr.9b06706>.
- (14) Bonales, L. J.; Rodríguez-Villagra, N.; Sánchez-García, I.; Montoro, O. R. U(VI)

Speciation Studies by Raman Spectroscopy Technique in the Production of Nuclear Fuel. *Progress in Nuclear Energy* **2022**, *145*, 104122. <https://doi.org/10.1016/j.pnucene.2022.104122>.

(15) Drobot, B.; Steudtner, R.; Raff, J.; Geipel, G.; Brendler, V.; Tsushima, S. Combining Luminescence Spectroscopy, Parallel Factor Analysis and Quantum Chemistry to Reveal Metal Speciation – a Case Study of Uranyl(VI) Hydrolysis. *Chem. Sci.* **2015**, *6* (2), 964–972. <https://doi.org/10.1039/C4SC02022G>.

(16) Wang, Z.; Zachara, J. M.; Gassman, P. L.; Liu, C.; Qafoku, O.; Yantasee, W.; Catalano, J. G. Fluorescence Spectroscopy of U(VI)-Silicates and U(VI)-Contaminated Hanford Sediment. *Geochimica et Cosmochimica Acta* **2005**, *69* (6), 1391–1403. <https://doi.org/10.1016/j.gca.2004.08.028>.

(17) Thangavelu, S. G.; Pope, S. J. A.; Cahill, C. L. Synthetic, Structural, and Luminescence Study of Uranyl Coordination Polymers Containing Chelating Terpyridine and Trispyridyltriazine Ligands. *CrystEngComm* **2015**, *17* (32), 6236–6247. <https://doi.org/10.1039/C5CE00984G>.

(18) Meinrath, G. Uranium(VI) Speciation by Spectroscopy. *J Radioanal Nucl Chem* **1997**, *224* (1–2), 119–126. <https://doi.org/10.1007/BF02034623>.

(19) Morrison, G.; zur Loye, H.-C. Flux Growth of  $[\text{NaK}_6\text{F}][(\text{UO}_2)_3(\text{Si}_2\text{O}_7)_2]$  and  $[\text{KK}_6\text{Cl}][(\text{UO}_2)_3(\text{Si}_2\text{O}_7)_2]$ : The Effect of Surface Area to Volume Ratios on Reaction Products. *Crystal Growth & Design* **2016**, *16* (3), 1294–1299. <https://doi.org/10.1021/acs.cgd.5b01408>.
